# Supplementary material for: Protein Networks as Logic Functions in Development and Cancer
Source: PLoS Comput Biol. 2011 Sep 29;7(9):e1002180. doi: 10.1371/journal.pcbi.1002180 (PMC3182870; doi:10.1371/journal.pcbi.1002180)
Supplement: Table S2 — Predictive interactions between known oncogenes and tumor suppressors identified among top-scoring gene pairs from the NGF analysis. (XLS) [file pcbi.1002180.s009.xls]

## Sheet: Sheet1
Coherently Upregulated top-scoring pairs					Coherently Downregulated top-scoring pairs					Opposing top-scoring pairs
Entrez ID 1	Entrez ID 2	Interac tion Accuracy	Oncogene-Oncogene Interaction		Entrez ID 1	Entrez ID 2	Interac tion Accuracy	Tumor Suppressor - Tumor Suppressor Interaction		Entrez ID 1 (UP)	Entrez ID 2 (DOWN)	Interac tion Accuracy	Oncogene - Tumor Suppressor Interaction
1051	4088	0.918535	FALSE		4297	6045	0.875041	FALSE		1051	6880	0.918212	FALSE
1051	860	0.917315	TRUE		1387	1602	0.87468	FALSE		1051	1054	0.916167	FALSE
1051	1958	0.91519	TRUE		1387	5757	0.874118	TRUE		6774	26039	0.912343	FALSE
1051	6722	0.911751	FALSE		367	190	0.868959	FALSE		3065	54880	0.911526	FALSE
1051	4790	0.909574	TRUE		1387	51193	0.866536	FALSE		1051	4089	0.90954	TRUE
1051	6688	0.906552	TRUE		1387	3159	0.862954	FALSE		1051	3190	0.906044	FALSE
1051	861	0.905695	TRUE		1387	4605	0.860538	FALSE		6774	2624	0.905183	FALSE
1051	6689	0.903638	FALSE		7003	6908	0.860524	FALSE		1051	1649	0.903107	FALSE
1051	5970	0.902592	TRUE		54880	10014	0.857497	FALSE		1051	9439	0.884107	TRUE
1051	7157	0.90253	TRUE		1387	8092	0.854884	FALSE		6774	4654	0.883724	FALSE
1052	1051	0.902378	FALSE		1387	466	0.849981	FALSE		4854	9794	0.881592	FALSE
1051	6597	0.897413	FALSE		26036	8216	0.849138	FALSE		6774	3280	0.880067	FALSE
1051	1050	0.893576	FALSE		5928	1387	0.8441	TRUE		6775	1387	0.878722	FALSE
1051	10155	0.890105	FALSE		2033	3151	0.843882	FALSE		1487	1387	0.876012	FALSE
1051	2099	0.889914	FALSE		1387	3065	0.842191	TRUE		6774	2305	0.875238	FALSE
1051	468	0.879965	FALSE		2960	8805	0.839609	FALSE		6774	8648	0.874851	FALSE
6722	22926	0.878988	FALSE		1387	1616	0.83847	FALSE		4778	1387	0.873432	FALSE
1051	6667	0.877222	TRUE		1387	1869	0.829518	TRUE		7157	1387	0.872761	TRUE
1052	1050	0.875872	FALSE		1387	79753	0.827964	FALSE		6688	1387	0.87214	TRUE
3725	3224	0.874391	FALSE		26039	2001	0.827591	FALSE		6722	7003	0.871709	FALSE
6774	6777	0.871794	FALSE		2100	6667	0.825314	TRUE		1050	1387	0.871651	FALSE
1051	6598	0.870298	TRUE		8850	3151	0.824613	FALSE		6720	1387	0.87118	TRUE
6774	4869	0.869219	TRUE		1387	2959	0.821599	FALSE		1051	1387	0.869138	TRUE
10538	3726	0.867762	FALSE		1387	2114	0.819183	TRUE		6774	1387	0.868739	TRUE
6774	3725	0.864034	TRUE		26039	6932	0.819005	FALSE		6778	1387	0.867634	FALSE
4790	5971	0.856867	TRUE		26039	9759	0.8157	FALSE		6662	1387	0.867493	FALSE
8841	6774	0.852329	FALSE		26039	2033	0.811591	FALSE		1045	1387	0.866973	TRUE
6778	9802	0.849253	FALSE		1387	7161	0.811093	TRUE		6774	672	0.864115	TRUE
3398	5925	0.847132	FALSE		2960	9139	0.810476	FALSE		4149	7003	0.86348	FALSE
3727	10987	0.846334	FALSE		2099	190	0.809834	FALSE		5371	1387	0.860167	TRUE
2962	2961	0.846092	FALSE		1387	2551	0.809142	FALSE		4790	55922	0.859987	FALSE
6778	6774	0.840196	FALSE		1387	10657	0.808872	FALSE		1316	9314	0.859954	TRUE
3159	1051	0.83682	TRUE		1387	4089	0.808034	TRUE		3725	4087	0.859839	TRUE
1386	1051	0.834814	FALSE		1387	3205	0.80307	FALSE		5970	1387	0.856377	TRUE
6688	5925	0.833254	TRUE		3205	5087	0.801644	FALSE		6774	367	0.854399	TRUE
3726	8061	0.833046	TRUE		1788	10472	0.800929	FALSE		6722	8538	0.853956	FALSE
6774	10524	0.829434	FALSE		1387	1999	0.799648	FALSE		6774	7707	0.853604	FALSE
2308	1051	0.827633	FALSE		5083	8431	0.799557	FALSE		6774	10657	0.852979	FALSE
6258	6722	0.826554	FALSE		4211	5316	0.799371	FALSE		6774	5610	0.85228	TRUE
602	10524	0.823941	FALSE		1387	25833	0.797617	TRUE		1316	8841	0.852077	TRUE
1316	2975	0.823751	FALSE		2099	6908	0.796429	FALSE		7067	1387	0.851616	TRUE
3726	2355	0.820867	FALSE		1387	2274	0.796424	FALSE		602	580	0.84928	TRUE
6667	1997	0.820862	FALSE		1387	2002	0.796398	FALSE		3064	1387	0.847517	FALSE
6774	6776	0.820566	FALSE		5928	9759	0.796238	FALSE		6774	2033	0.846632	FALSE
6722	2962	0.816669	FALSE		11177	6304	0.79549	FALSE		6774	10401	0.846025	FALSE
4609	1051	0.816525	TRUE		1387	8841	0.795046	TRUE		2962	2959	0.84479	FALSE
1316	7157	0.816043	TRUE		7067	2959	0.795029	FALSE		1051	1385	0.844304	TRUE
4790	142	0.813411	FALSE		4149	83463	0.794335	FALSE		10499	1387	0.844229	FALSE
3725	6602	0.813166	FALSE		6426	11168	0.794123	FALSE		2033	1387	0.841792	FALSE
6599	1051	0.812558	FALSE		1387	26039	0.792485	FALSE		1051	6778	0.841306	FALSE
